# Supplementary material
Source: publisher figshare collection journal article supplement (https://tandf.figshare.com/ndownloader/files/22514720)
Supplement: Supplementary file 1 [file 22514720]

**S1) Materials and Methods**

**Tissue Preparation and Sectioning.**

Mouse heads (day 5 and days 11/12) were dissected as RNase-free as possible and put directly into cold 20% ethylenediaminetetraacetic acid (EDTA) made with diethyl pyrocarbonate (DEPC) treated water. After two days decalcification, the heads were washed in cold RNase-free ddH2O. The heads were fixed in methacarn (60% methanol, 30% chloroform, 10% acetic acid) for 1 h at 4°C, transferred into 100% ethanol 3x, for 20 min. at 4°C, and then submerged in 30% sucrose solution at 4°C until infiltrated. The heads were embedded in OCT and stored at -80°C. The cryostat was wiped with RNaseZAP (Life Technologies, Grand Island, NY) prior to use to minimize the sections’ exposure to RNases and prevent cross-contamination from samples previously sectioned on the cryostat. Brushes and knives for sectioning were also made RNase-free prior to use, and gloves were changed frequently. Slides were touched minimally and only came into contact with RNase-free surfaces (RNase-free slide box). Membrane slides (slides made specifically for laser microdissection) were employed.

**Laser Micro-Dissection (LMD) and Library Construction**

Day 5 (secretory stage) and days 11/12 (maturation stage) first molars cryosections were micro-dissected using a Leica LMD (Leica AS LMD. Leica Microsystems, Buffalo Grove, IL). Ameloblasts were dissected from the cusp slopes only (areas near the cervical loop cusp tips were avoided) and transferred to RNase-free 0.2 mL PCR test tubes by gravity alone. The dissected ameloblasts were collected into extraction buffer from the PicoPure RNA Isolation Kit (Life Technologies). Forty sections per age group were placed on slides and dehydrated in graded series of ethanol followed by xylene. The lysis buffer + microdissected tissue was incubated at 42°C and then stored at -80°C, until collection was complete. The cell extracts were pooled according to age group, and the RNA was extracted (Arcturus’ PicoPure RNA Isolation Kit, Life Technologies), maintaining RNase free conditions. RNA was kept at -80°C or on dry ice at all times before cDNA library construction. NuGEN WT (whole transcriptome)-Ovation Pico RNA Amplification system was utilized to generate the cDNA library. Sequencing was performed on an Illumina Sequencer by the University of Michigan DNA Sequencing Core.

**Mouse Reference Genome**

Mouse genome reference sequences (mm9) for all of chromosomes and the associated gtf file were downloaded from the University of California Santa Cruz (UCSC) genome browser (<http://genome.ucsc.edu>) at the time this study was conducted.

**Map Reads onto the Mouse Genome and Identification of Differentially Expressed Genes**

TopHat software [[1](#_ENREF_1)] was used to map short read sequences from spliced transcripts to the whole genome. The “–no-coverage-search option” was used while all other parameters were adopted from their defaults. Samtools [[2](#_ENREF_2)] was used to remove duplicates from the aligned bam files. The filtered bam alignment files were further processed by Cufflinks [[3](#_ENREF_3)] for estimating transcripts’ abundances and testing for differential expression between secretory (Day 5) and maturation (Days 11/12) stage samples. Expression levels were listed in fragments per kilobase of transcript per million mapped reads (FPKM) and fold change was calculated by dividing the maturation stage FPKM value by the secretory stage FPKM value for each gene. Up- or down-regulated gene lists were selected using cutoff criteria of q-values ≤ 0.05, based upon false discovery rate (FDR) analyses, and a minimum fold change ≥ 1.5. DAVID (Database for Annotation, Visualization and Integrated Discovery) was used to perform gene ontology (GO) analysis and functional annotations.

**Immunohistochemistry of PAR1**

Postnatal day 14 mouse heads were fixed via immersion in 4% paraformaldehyde overnight at 4°C, washed several times in PBS, and decalcified at 4°C in 4.13% EDTA (pH 7.3) for 30 days. Following decalcification, the samples were washed in PBS, dehydrated through a graded series of ethanol and xylene, and embedded in paraffin. The blocks were sectioned at 5 μm thickness. Sections were heat-treated with antigen retrieval solution (ab973, Abcam, Cambridge, MA), followed by several washes with PBT (0.1% Triton-X in 1xPBS). The sections were then blocked with sheep serum (S-22, Chemicon, Billerica, MA, USA), and incubated with PAR1 antibody (1:100, ab32611, Abcam, Cambridge, MA, USA) overnight at 4°C. Following the primary antibody incubation, sections were washed and incubated with anti-rabbit IgG secondary antibody conjugated with Alexa Fluor 594 (1:500, A11012, Invitrogen, La Jolla, CA) for 30 min at room temperature, washed and then mounted with ProLong® Gold antifade reagent containing DAPI (P-36931; Invitrogen).

**References**

1. Trapnell C, Pachter L, Salzberg SL. TopHat: discovering splice junctions with RNA-Seq. *Bioinformatics* 2009;25:1105-11.

2. Li H, Handsaker B, Wysoker A, Fennell T, Ruan J, Homer N, Marth G, Abecasis G, Durbin R. The Sequence Alignment/Map format and SAMtools. *Bioinformatics* 2009;25:2078-9.

3. Trapnell C, Williams BA, Pertea G, Mortazavi A, Kwan G, van Baren MJ, Salzberg SL, Wold BJ, Pachter L. Transcript assembly and quantification by RNA-Seq reveals unannotated transcripts and isoform switching during cell differentiation. *Nat Biotechnol* 2010;28:511-5.

**S2) Genes with Higher Expression in Maturation Relative to Secretory Stage Ameloblasts**

**Gene Sec Mat Fold Gene Sec Mat Fold Gene Sec Mat Fold**

Cox6a2 0.0 9.3 inf Il1r2 0.2 2.4 10.4 Ptprj 0.5 3.6 6.6

Crabp1 0.0 3.2 inf Scn1b 3.4 34.7 10.1 2810405K02Rik 3.2 21.2 6.6

Ly6g6d 0.0 12.2 inf Gpr155 1.9 18.4 9.9 P2ry6 0.6 3.6 6.6

Spink2 0.0 4.7 inf Scpep1 0.6 5.5 9.9 Phospho1 1.0 6.6 6.6

Spink8 0.0 4.1 inf Rundc3a 0.5 4.8 9.8 Nfatc2 0.5 3.3 6.6

Tekt2 0.0 1.9 inf Ap1s2 0.5 4.5 9.5 Plekho2 0.5 3.5 6.5

Adora2b 0.1 5.6 55.1 Adap1 0.5 4.4 9.5 Sdc3 1.1 7.1 6.5

2200001I15Rik 2.3 123.0 52.7 Clca5 0.2 1.8 9.3 Gpx3 9.0 58.2 6.5

Serpinb6b 0.1 3.2 46.2 Stc1 0.5 4.6 9.3 D730039F16Rik 0.3 1.8 6.4

Slc6a14 0.1 5.0 43.3 Batf3 1.3 12.4 9.3 A830010M20Rik 0.6 3.5 6.4

Xist 0.1 4.6 42.6 Rgs9 0.2 1.9 9.2 Sez6l 0.4 2.9 6.4

Enpp1 0.3 10.9 41.7 Lypd3 0.7 6.6 9.2 5730559C18Rik 1.2 7.8 6.4

Ly6g6e 0.1 5.6 37.7 Cyp4f39 0.2 1.8 9.0 Krt19 0.8 5.2 6.4

Scpppq1 2.5 90.4 35.9 Mmp23 2.1 18.6 9.0 Itm2a 2.0 12.9 6.4

Emb 0.3 11.2 33.6 Gpr153 1.3 11.6 8.9 Insl3 3.2 20.3 6.4

Gpr64 0.3 9.6 33.6 2200002D01Rik 17.6 157.0 8.9 Eno2 0.3 2.1 6.3

Cck 0.5 13.5 28.8 Plekhg6 0.8 7.0 8.8 Mreg 0.7 4.4 6.3

Mme 0.5 14.1 25.8 Parp3 0.4 3.2 8.7 Eps8l2 1.1 7.1 6.3

Bglap-rs1 0.4 10.6 25.8 Lgals3 2.8 24.3 8.7 Cyb561 2.1 13.1 6.3

Anxa8 1.4 34.3 25.2 Fxyd5 1.1 9.7 8.7 Stk39 1.0 6.3 6.3

Sult2b1 0.8 21.4 25.2 D4Bwg0951e 2.8 23.6 8.6 Adamts2 0.4 2.3 6.3

Smoc2 0.4 11.2 24.9 Sidt1 0.2 1.7 8.6 Mt1 34.8 217.9 6.3

Tex11 0.2 3.8 24.5 Nebl 0.2 1.5 8.6 Isg20 0.9 5.9 6.2

Gpr176 0.4 10.5 23.8 Slc39a2 0.8 7.2 8.6 Rrad 0.7 4.3 6.2

Chn2 0.3 7.8 23.6 Pde8a 0.7 6.0 8.5 Acadl 1.5 9.2 6.2

Cx3cl1 0.2 5.2 23.6 Ccdc109b 2.0 17.2 8.5 Col9a3 0.6 3.7 6.2

Foxc1 0.2 4.8 23.5 Sorl1 0.3 2.5 8.5 H2-D1 0.8 4.9 6.1

Tmem132e 0.4 10.1 23.0 Pcsk6 0.3 2.2 8.5 Cpd 0.6 3.6 6.1

Mt2 6.9 157.5 22.9 Lyn 0.7 5.8 8.4 Stard13 0.3 1.6 6.1

Slc34a2 1.0 22.1 22.3 Prima1 1.5 13.0 8.4 Best1 0.3 1.8 6.0

Akr1c18 1.8 36.4 20.7 Hlf 0.4 3.2 8.3 Krt42 1.1 6.3 6.0

Dmkn 1.4 27.3 20.1 Tsc22d3 1.2 9.8 8.3 4632428N05Rik 0.6 3.6 6.0

Gsta4 0.6 11.0 18.9 Maff 0.3 2.6 8.3 Panx3 1.2 7.3 6.0

Inhba 0.5 9.7 18.1 Casp1 1.4 11.4 8.2 Plbd1 2.5 14.5 5.9

Plb1 6.0 103.9 17.2 Slc26a7 0.4 3.0 8.2 Gad1 1.2 7.3 5.9

Gdpd2 0.2 3.2 16.6 Fads3 1.1 8.9 8.1 Nqo1 0.5 2.7 5.9

Krt24 0.2 3.9 15.9 Osbpl3 0.4 3.4 8.1 Ntrk2 1.0 5.7 5.8

Ttc39c 0.6 9.4 15.5 B4galnt3 0.4 3.4 8.1 Snrpn 1.4 7.9 5.8

Leprel1 0.3 4.0 15.2 Cav2 0.9 7.1 8.0 Gpr137b-ps 0.6 3.5 5.8

Slc1a1 0.4 5.6 15.1 Ptk2b 0.7 6.0 8.0 Aqp1 0.8 4.5 5.8

Wnt10b 1.3 19.0 15.1 1190003J15Rik 5.6 44.9 8.0 Adcy4 0.3 1.5 5.8

Ephx4 0.5 6.9 15.0 Ebp 0.4 3.4 8.0 Hpcal1 2.7 15.8 5.8

Myom3 0.2 2.8 15.0 Gng11 2.0 15.6 7.8 Zfp185 1.7 10.0 5.7

Galm 0.2 3.4 14.1 Bglap2 9.0 69.8 7.7 Spnb3 0.5 3.1 5.7

Mmp13 0.2 2.7 13.7 Ptprb 0.3 2.1 7.7 Rras2 4.5 25.7 5.7

Stc2 0.9 12.4 13.7 Lmo4 1.4 10.8 7.6 Cspg4 0.5 2.9 5.7

Defb1 0.3 3.7 13.6 Cryaa 1.3 9.8 7.6 Micall2 0.3 1.7 5.7

Sema3c 0.1 1.6 13.5 Nrp2 1.0 7.5 7.5 Rhof 1.1 6.0 5.7

Atg9b 0.6 8.0 13.4 Fam46b 1.9 14.4 7.5 Rab3ip 1.4 8.1 5.7

Lmo1 0.4 5.3 13.1 Parm1 1.8 13.4 7.5 Fhl3 0.5 3.0 5.7

Krt16 0.2 3.2 13.0 Ctsc 0.4 2.7 7.4 Mdfi 3.0 16.8 5.6

Tnik 0.3 4.3 12.8 9030617O03Rik 0.3 1.9 7.3 Pdgfc 1.0 5.9 5.6

Dsg3 0.3 4.0 12.7 Wdfy2 0.2 1.6 7.3 Foxq1 4.2 23.7 5.6

Nos1 0.3 4.0 12.3 Ly6a 0.7 5.1 7.2 Slc9a3r1 2.6 14.8 5.6

Ramp3 0.5 5.6 12.3 1110021L09Rik 2.7 19.9 7.2 Scara3 3.7 21.0 5.6

Ggt1 3.4 40.8 12.1 1190002H23Rik 1.4 10.4 7.2 Hsd17b11 0.8 4.5 5.6

Krt6a 1.1 13.1 12.1 Dhrs7 0.6 4.7 7.2 S100a13 6.4 35.9 5.6

Ablim1 0.7 8.8 12.1 B4galnt1 0.6 4.0 7.2 Srxn1 1.1 5.9 5.5

Fxyd4 11.7 132.2 11.3 Epdr1 1.0 6.9 7.2 Stxbp1 0.4 2.3 5.5

Cyfip2 0.3 2.9 11.3 Chst10 0.3 2.1 7.2 Cd34 0.8 4.3 5.5

Itgb3 0.7 7.5 11.3 Gpihbp1 0.7 4.9 7.2 Nfatc1 0.5 2.7 5.5

Anpep 0.5 5.7 11.2 Eng 0.7 4.8 7.0 P2ry2 0.8 4.2 5.5

3110082D06Rik 0.4 4.8 11.2 Tacstd2 1.1 7.9 7.0 Egfl7 1.9 10.3 5.5

Sulf2 1.1 11.9 11.2 Htra1 0.7 4.8 7.0 Kank1 1.2 6.3 5.5

Itgb7 0.7 7.3 11.0 Sec14l2 0.6 4.4 6.9 Lmo2 1.4 7.4 5.4

Plekha2 0.6 6.3 11.0 Ppp1r14c 0.8 5.8 6.9 Tuba4a 2.6 14.2 5.4

Gpnmb 0.2 2.3 10.8 Ctrc 1.3 8.8 6.8 Rnf135 0.5 2.8 5.4

Slc15a1 0.5 5.0 10.8 Dclk2 0.9 6.0 6.7 Frrs1 1.4 7.4 5.4

**Gene Sec Mat Fold Gene Sec Mat Fold Gene Sec Mat Fold**

1600029D21Rik 0.5 5.1 10.5 Wdyhv1 0.7 4.4 6.7 Tfrc 0.7 3.6 5.4

Cox6b2 20.6 110.5 5.4 Sema3d 0.6 2.6 4.5 Apeh 1.5 5.8 3.8

Glul 4.7 25.4 5.4 Mettl7a1 1.9 8.3 4.5 Cpe 3.4 13.0 3.8

Epcam 1.5 8.0 5.4 Myo1e 0.9 4.0 4.5 Adamts17 0.8 3.1 3.8

Fam13a 1.6 8.4 5.3 Ttc9 0.6 2.5 4.5 Dnm1 2.9 10.9 3.8

Ifi27l1 6.0 32.1 5.3 Sqle 2.4 10.6 4.4 B2m 4.3 16.2 3.8

Bpil2 0.6 3.2 5.3 Rbpms2 1.9 8.6 4.4 Slco2a1 0.4 1.5 3.8

Sgk1 5.5 28.8 5.3 Sun2 1.0 4.6 4.4 Rorc 1.0 3.8 3.8

Esm1 0.3 1.7 5.3 Rnf144b 0.3 1.5 4.4 Ptchd2 0.4 1.5 3.8

Rgs10 1.7 9.1 5.3 Rnf128 0.4 1.9 4.4 1810014F10Rik 6.3 23.7 3.8

Slc4a11 0.3 1.5 5.3 Rell1 1.9 8.2 4.4 Emcn 1.3 4.7 3.8

Clmn 0.4 2.0 5.2 Tnc 2.0 8.8 4.4 Stim1 2.5 9.5 3.7

Crip2 4.9 25.4 5.2 Cables1 1.4 6.1 4.4 Steap3 1.0 3.6 3.7

Htra3 0.9 4.8 5.2 Thy1 0.9 3.8 4.3 Ccnyl1 2.4 8.9 3.7

Igfbp3 1.4 7.2 5.1 Spsb4 1.4 6.1 4.3 Tspan15 0.9 3.3 3.7

Sc4mol 1.4 7.2 5.1 Mapkapk3 0.6 2.7 4.3 Gas1 1.6 6.0 3.7

AI661453 0.4 2.1 5.1 Ankrd6 0.6 2.5 4.2 Ifitm3 13.2 49.3 3.7

Dusp2 3.6 18.4 5.1 Abhd14b 1.0 4.3 4.2 Klf6 0.6 2.2 3.7

Capn5 0.4 1.8 5.1 Cited4 3.6 15.0 4.2 Rnf157 2.7 9.9 3.7

Insc 1.5 7.5 5.0 Rcor2 2.2 9.2 4.2 Nr4a1 1.6 5.8 3.7

Dock8 0.5 2.5 5.0 Cyp39a1 0.5 2.3 4.2 Nfe2l3 1.2 4.5 3.7

Pthlh 1.1 5.3 5.0 Pak1 4.3 18.2 4.2 S100a6 31.9 116.1 3.6

Gpr137b 0.4 2.1 5.0 Mtfp1 1.1 4.4 4.2 Trib2 0.6 2.2 3.6

Spata13 0.4 1.8 5.0 Il6st 1.1 4.4 4.2 Cercam 1.9 7.1 3.6

Rbm47 0.5 2.4 5.0 Thrb 0.6 2.4 4.2 Cnnm2 3.2 11.7 3.6

Cyr61 0.8 4.1 5.0 Pdgfrb 0.4 1.7 4.2 Scarb1 1.7 6.3 3.6

Postn 0.9 4.5 4.9 Galc 1.0 4.2 4.1 Tacc2 1.2 4.5 3.6

Bok 2.7 13.4 4.9 Snx33 0.6 2.6 4.1 Myo6 2.5 9.2 3.6

P2rx4 0.8 3.9 4.9 Tpbg 1.6 6.8 4.1 Apbb1 1.4 5.0 3.6

Nccrp1 0.7 3.5 4.9 Tmem98 2.8 11.6 4.1 Ifngr2 1.0 3.7 3.6

Baiap2 2.5 12.2 4.9 Cxcr7 4.6 19.1 4.1 Myh14 5.2 18.5 3.6

Dmpk 3.7 18.0 4.9 Dkk3 2.0 8.4 4.1 Gpr115 4.0 14.3 3.6

Marveld3 1.8 8.9 4.9 Wee1 0.4 1.7 4.1 Ocln 1.0 3.4 3.6

D630023F18Rik 0.7 3.7 4.9 Gch1 0.5 1.9 4.1 Fam38a 0.7 2.7 3.6

Scarb2 0.9 4.4 4.9 Nipal2 1.1 4.3 4.1 Cd300lg 1.2 4.4 3.6

Tes 0.6 3.0 4.9 Sdc4 7.0 28.5 4.1 1190002N15Rik 0.6 2.0 3.6

Efhd2 3.5 16.8 4.8 Nhedc2 1.6 6.6 4.1 Ptp4a1 6.4 22.7 3.5

Sorbs1 0.5 2.6 4.8 Magee1 0.4 1.6 4.1 Hsd3b7 5.5 19.5 3.5

Pla2g16 0.7 3.2 4.8 Itpr2 1.3 5.2 4.1 Chst12 3.3 11.6 3.5

2210411K11Rik 6.8 33.0 4.8 Col6a1 0.4 1.5 4.1 Col6a2 1.1 4.0 3.5

Nbeal2 0.8 3.7 4.8 BC057022 1.0 4.0 4.1 1700037H04Rik 2.4 8.4 3.5

Fam189a2 3.2 15.3 4.8 Carhsp1 1.3 5.4 4.0 Atg16l2 1.0 3.5 3.5

Bean1 0.3 1.5 4.7 1110007C09Rik 6.4 25.9 4.0 Wif1 1.3 4.4 3.5

Junb 2.2 10.5 4.7 Gm14057 0.9 3.4 4.0 Adamts1 0.6 2.1 3.5

Sema4c 1.0 4.8 4.7 Col3a1 1.8 7.4 4.0 Egfr 0.7 2.4 3.5

Ehd4 0.6 2.7 4.7 Svip 1.4 5.6 4.0 Ndrg4 0.9 3.2 3.5

Epb4.1l1 0.8 3.6 4.7 Fam102a 1.9 7.6 4.0 4930523C07Rik 0.8 3.0 3.5

Ier3 4.2 19.6 4.7 Tcn2 11.1 44.2 4.0 Cybasc3 3.0 10.4 3.5

Myb 0.3 1.6 4.7 Ppp2r5a 3.4 13.6 4.0 2900026A02Rik 1.8 6.4 3.5

Bcr 1.1 4.9 4.6 Mmp15 1.1 4.4 4.0 Cox7a1 20.2 70.4 3.5

Plekhf2 1.6 7.2 4.6 Stk38l 1.9 7.5 4.0 Creb3l1 1.1 4.0 3.5

Lum 1.6 7.5 4.6 Stac 0.6 2.4 4.0 Prim1 1.5 5.1 3.5

H2-K1 1.3 5.9 4.6 Cobll1 2.2 8.5 4.0 Vcl 2.2 7.6 3.5

Ltbp1 0.8 3.6 4.6 Tmem119 0.6 2.4 4.0 Dock4 0.4 1.5 3.5

Sdcbp2 0.7 3.2 4.6 Col15a1 0.6 2.6 3.9 Acp5 2.7 9.3 3.5

Fyn 0.5 2.5 4.6 Esam 1.3 5.3 3.9 Syngr2 4.0 13.7 3.5

Glis3 0.4 2.0 4.6 Phyh 1.8 7.1 3.9 Pecam1 0.6 2.0 3.4

Rhod 2.3 10.6 4.5 Impa2 1.5 5.9 3.9 Hsd17b7 1.0 3.6 3.4

Tshz2 0.7 3.1 4.5 Cox4i2 7.4 29.2 3.9 Usp24 1.1 3.9 3.4

Rgs5 3.9 17.6 4.5 Csrp1 4.7 18.4 3.9 Cdcp1 1.7 5.7 3.4

Nxn 1.1 5.0 4.5 Cnnm4 2.6 10.0 3.9 Gp1bb 2.6 8.8 3.4

Crot 1.0 4.3 4.5 Serping1 1.3 5.2 3.9 1500011K16Rik 4.2 14.1 3.4

Wdr72 3.0 13.4 4.5 2610019F03Rik 1.6 6.1 3.9 Camk1d 0.7 2.3 3.4

Mocos 0.8 3.8 4.5 Slit2 0.6 2.4 3.9 Rin1 0.6 1.9 3.4

Map4k2 0.4 1.8 4.5 BC021614 3.2 12.4 3.9 Aebp2 1.4 4.7 3.4

Pdgfb 1.1 4.9 4.5 Afap1 0.9 3.3 3.9 Slc23a2 1.8 6.2 3.4

Ccdc120 0.5 2.4 4.5 Cd320 1.2 4.8 3.9 Mcm6 0.8 2.7 3.4

Fundc2 1.0 4.6 4.5 Col13a1 0.7 2.7 3.8 Vps37b 3.4 11.3 3.3

Ero1lb 0.5 2.1 4.5 Errfi1 2.8 10.7 3.8 Ecm1 2.0 6.6 3.3

Rhbdl2 2.8 12.4 4.5 Bhlhe40 3.2 12.3 3.8 Ehd3 0.9 3.0 3.3

**Gene Sec Mat Fold Gene Sec Mat Fold Gene Sec Mat Fold**

Ano1 0.5 1.8 3.3 Sik1 1.3 3.8 3.0 Ifi30 5.8 15.3 2.6

Vwa1 1.3 4.3 3.3 Rapgef2 1.0 3.0 3.0 Cldn1 13.4 35.1 2.6

Ube2d1 4.7 15.5 3.3 Pam 0.9 2.8 3.0 Lgmn 2.3 5.9 2.6

Me1 2.9 9.7 3.3 Kif21b 0.6 1.8 3.0 Ostf1 3.1 8.1 2.6

Itga6 3.6 12.1 3.3 Pcolce 3.1 9.1 2.9 Hes6 4.3 11.1 2.6

Neat1 23.3 77.4 3.3 Cyp51 1.8 5.3 2.9 Prex1 1.5 3.9 2.6

Pkp4 5.3 17.5 3.3 Kcnn4 17.6 51.5 2.9 Fam108c 7.6 19.6 2.6

Fam167a 1.8 5.9 3.3 Cyp4f16 1.3 4.0 2.9 Matn2 3.6 9.3 2.6

Ninj1 2.8 9.0 3.3 Cd82 2.0 5.7 2.9 Fgf13 1.9 4.9 2.6

Gpx2 3.2 10.5 3.3 Ttc7 0.7 2.1 2.9 Lgals1 8.4 21.7 2.6

Slc24a4 13.4 44.1 3.3 Plekha1 3.0 8.6 2.9 Ide 4.5 11.5 2.6

Bmp1 6.4 21.0 3.3 Hspb8 2.6 7.5 2.9 Ablim2 3.1 8.0 2.6

Aplnr 0.8 2.8 3.3 Cpt1a 2.4 7.0 2.9 Arhgef10l 3.5 8.9 2.6

Igfbp2 9.2 29.9 3.3 Hk1 2.3 6.8 2.9 Mrc2 1.4 3.5 2.5

3-Sep 1.3 4.1 3.3 Cdc25b 1.1 3.2 2.9 Prdx6 4.5 11.3 2.5

Ppm1l 1.9 6.1 3.3 Mef2a 1.1 3.2 2.9 Dnase2a 3.2 8.2 2.5

Spon1 0.8 2.6 3.3 Vrk3 2.4 6.9 2.9 Megf9 1.9 4.9 2.5

Gltpd1 1.2 3.8 3.3 Slc7a6 3.7 10.8 2.9 Serinc2 8.0 20.2 2.5

Cftr 3.1 10.0 3.3 Btd 1.5 4.4 2.9 Pdha1 4.1 10.4 2.5

Ttyh2 1.7 5.5 3.3 Bak1 1.7 4.9 2.9 Col4a2 3.1 7.8 2.5

Hspa1b 2.6 8.3 3.2 AI314976 3.4 9.7 2.9 Zdhhc8 1.7 4.2 2.5

Hmgn5 2.0 6.4 3.2 Lnx2 1.2 3.4 2.9 Dci 5.7 14.3 2.5

Ly6c1 3.2 10.2 3.2 Renbp 3.4 9.7 2.9 Arhgef5 4.5 11.3 2.5

Cast 1.1 3.7 3.2 Mmrn2 0.9 2.5 2.9 Cd9 11.6 28.8 2.5

Mast4 2.7 8.6 3.2 Dsc2 0.6 1.6 2.9 Tln2 0.8 2.1 2.5

Nkiras2 3.0 9.4 3.2 Arhgef17 2.6 7.5 2.9 Adarb1 1.6 3.9 2.5

Grb10 0.7 2.1 3.2 Pepd 4.2 12.0 2.8 Adk 4.0 10.0 2.5

Idh1 4.9 15.7 3.2 Atp6v1a 5.3 15.0 2.8 Slc31a2 3.0 7.3 2.5

Ptpn13 1.5 4.9 3.2 Tapbp 4.8 13.6 2.8 Irx3 6.5 16.1 2.5

Ptplb 0.8 2.7 3.2 Hmgcs1 1.5 4.1 2.8 Hspa2 4.7 11.7 2.5

P2ry1 0.6 2.0 3.2 Timp3 3.0 8.4 2.8 Mboat2 2.1 5.2 2.5

Nbl1 1.3 4.0 3.1 Crim1 2.0 5.5 2.8 Col1a1 10.3 25.4 2.5

Hs3st3a1 0.9 3.0 3.1 Rbbp8 1.8 4.9 2.8 Ptprm 1.3 3.2 2.5

Adam9 0.7 2.2 3.1 Arap3 0.7 2.0 2.8 Wfs1 3.9 9.6 2.4

Tmem123 1.6 5.0 3.1 Basp1 5.2 14.6 2.8 Plcd1 2.7 6.6 2.4

Sh2d7 0.8 2.4 3.1 Stac2 1.4 3.9 2.8 S100a1 40.4 98.3 2.4

Lama4 0.7 2.3 3.1 St3gal1 1.6 4.6 2.8 Gabarapl1 5.3 12.9 2.4

A330021E22Rik 2.0 6.2 3.1 Tmem184a 2.4 6.6 2.8 Dnaja4 2.3 5.5 2.4

4933436C20Rik 4.0 12.7 3.1 Bglap 21.2 58.8 2.8 Pdlim5 3.7 8.8 2.4

Fam176a 1.3 4.1 3.1 Fam126a 0.7 1.8 2.8 Id4 24.3 58.8 2.4

Anxa7 3.0 9.5 3.1 Cdh5 0.9 2.4 2.8 D10Wsu52e 4.2 10.1 2.4

Tmem43 3.6 11.2 3.1 Tax1bp3 15.3 42.5 2.8 Zmat3 2.9 6.9 2.4

Jup 7.8 24.3 3.1 Inhbb 2.9 8.1 2.8 Hip1r 3.8 9.0 2.4

Amdhd2 3.2 9.9 3.1 App 6.1 16.8 2.8 Spire1 1.3 3.1 2.4

Lfng 2.9 8.9 3.1 Grb14 2.6 7.2 2.8 Spg21 3.2 7.6 2.4

Prkch 0.9 2.8 3.1 F8a 1.6 4.3 2.7 Pcna 7.6 18.1 2.4

St3gal6 2.3 7.2 3.1 Col18a1 1.5 4.1 2.7 Rhog 11.7 27.7 2.4

Gpd2 0.5 1.7 3.1 Fam110a 4.9 13.4 2.7 Plxnb2 5.6 13.1 2.4

Snai3 2.7 8.2 3.1 Myo18a 2.1 5.7 2.7 Fam178a 0.8 1.9 2.4

Acaa1b 2.0 6.0 3.1 Mbnl1 3.1 8.4 2.7 Fscn1 5.7 13.5 2.3

Myh4 0.8 2.4 3.1 Pcnx 1.2 3.4 2.7 Rras 11.2 26.2 2.3

Ngef 3.5 10.9 3.1 Kctd10 4.5 12.2 2.7 Zfp36l2 3.3 7.7 2.3

Tgfb1 4.5 13.6 3.1 Parp4 1.0 2.6 2.7 Dhrs1 8.7 20.1 2.3

Ldlr 1.1 3.4 3.1 Agap1 1.6 4.3 2.7 2010106G01Rik 3.0 7.0 2.3

Slc35e4 1.5 4.6 3.1 Mafk 2.0 5.5 2.7 Cryl1 7.0 16.2 2.3

Sigirr 1.6 4.9 3.1 Trio 3.0 8.3 2.7 Plxna1 3.6 8.4 2.3

Mid1ip1 3.3 10.2 3.0 Col4a1 3.0 8.2 2.7 Gss 5.0 11.6 2.3

D930020B18Rik 0.7 2.2 3.0 Engase 1.2 3.3 2.7 4632411B12Rik 4.9 11.2 2.3

Trim29 7.8 23.6 3.0 Heca 1.2 3.2 2.7 Paxip1 1.8 4.0 2.3

Sparcl1 4.3 13.0 3.0 9930013L23Rik 2.3 6.1 2.7 Stxbp6 3.6 8.3 2.3

Rab3il1 1.3 3.9 3.0 Ivns1abp 9.9 26.7 2.7 Elf4 2.1 4.7 2.3

Robo4 0.7 2.0 3.0 Thbd 2.1 5.7 2.7 1500003O03Rik 10.7 24.2 2.3

Otud7b 1.4 4.3 3.0 Tspo 11.8 31.5 2.7 Dsc3 1.7 3.8 2.3

Tie1 0.8 2.4 3.0 Ppp2r5b 2.0 5.3 2.7 Wwp2 2.1 4.7 2.2

Ovol2 2.6 7.8 3.0 Idh3a 5.0 13.3 2.7 Dlat 2.3 5.1 2.2

Clic4 2.9 8.9 3.0 2310011J03Rik 6.9 18.3 2.7 Utrn 1.1 2.4 2.2

Slc6a8 6.4 19.2 3.0 Cd93 0.6 1.6 2.6 Calm3 13.0 28.8 2.2

Acsl4 0.7 2.1 3.0 Afap1l2 3.0 7.9 2.6 Cd164 3.9 8.7 2.2

Obfc2a 1.8 5.4 3.0 Calm1 5.4 14.2 2.6

**S3) Genes with Higher Expression in Secretory Relative to Maturation Stage Ameloblasts**

**Gene Sec Mat Fold Gene Sec Mat Fold Gene Sec Mat Fold**

Vps33b 1.8 0.8 0.5 Tcf7l1 10.8 4.1 0.4 Pcdh18 10.2 3.4 0.3

Pik3r2 9.1 4.1 0.5 Pard3b 2.7 1.0 0.4 Spry1 8.4 2.8 0.3

Mios 6.8 3.1 0.5 Rogdi 28.5 10.9 0.4 Fam125b 4.0 1.4 0.3

Tceb3 8.1 3.7 0.5 Prrc1 6.6 2.5 0.4 Ror2 1.7 0.6 0.3

Rasa2 1.6 0.7 0.4 Cdc42ep3 16.5 6.3 0.4 Mocs1 1.7 0.6 0.3

Bdh1 3.8 1.7 0.4 6820431F20Rik 3.8 1.5 0.4 Krt17 31.8 10.7 0.3

Chpf2 6.9 3.0 0.4 Maged2 7.5 2.8 0.4 Wdr41 7.0 2.3 0.3

Gmcl1 15.5 6.8 0.4 Mlec 5.7 2.1 0.4 Gzf1 7.7 2.6 0.3

Rab9 4.8 2.1 0.4 Kdm5b 7.7 2.9 0.4 Trps1 3.0 1.0 0.3

Rab11fip3 6.5 2.8 0.4 Fam49a 5.1 1.9 0.4 Gpr4 19.9 6.6 0.3

Tmem38a 9.7 4.2 0.4 Fermt1 2.9 1.1 0.4 Fkbp14 2.3 0.8 0.3

Enpp2 9.8 4.3 0.4 Lztfl1 5.0 1.9 0.4 Gpm6b 9.5 3.1 0.3

Lpar1 6.5 2.8 0.4 Mical2 6.6 2.4 0.4 Frat1 3.1 1.0 0.3

Fbxw5 7.0 3.0 0.4 Slc35a1 12.8 4.8 0.4 Uba5 15.8 5.2 0.3

1810074P20Rik 3.5 1.5 0.4 Bcar3 13.0 4.8 0.4 Gli2 3.5 1.1 0.3

2310067B10Rik 10.4 4.5 0.4 Galt 11.7 4.3 0.4 Tcf7l2 12.7 4.1 0.3

Galnt1 12.2 5.2 0.4 2900005J15Rik 10.7 3.9 0.4 Smpdl3a 12.6 4.1 0.3

Polr1a 2.2 0.9 0.4 Pak6 10.5 3.8 0.4 Serf1 27.0 8.8 0.3

Nav1 4.0 1.7 0.4 Cd24a 14.6 5.4 0.4 Mgp 94.0 30.6 0.3

Insr 1.6 0.7 0.4 Pdzd2 2.5 0.9 0.4 Dysf 1.5 0.5 0.3

Hn1l 9.5 4.1 0.4 Casc4 1.9 0.7 0.4 Npnt 2.7 0.9 0.3

Gabbr1 2.2 0.9 0.4 Prmt3 5.4 2.0 0.4 Csn3 45.7 14.7 0.3

Gdpd5 10.9 4.6 0.4 Ufsp2 8.9 3.3 0.4 Cldn20 21.0 6.7 0.3

Klhl13 3.9 1.7 0.4 Tnks 3.4 1.3 0.4 Dock1 4.7 1.5 0.3

Pid1 17.2 7.2 0.4 Ncam1 6.7 2.4 0.4 Impad1 6.0 1.9 0.3

Cdh2 11.3 4.7 0.4 Mobkl2b 9.9 3.6 0.4 Igf2bp3 5.1 1.6 0.3

Ppic 52.4 21.8 0.4 4930506M07Rik 5.1 1.8 0.4 Dock9 4.8 1.5 0.3

Pik3r1 3.6 1.5 0.4 Ppapdc1b 11.0 4.0 0.4 Plekha6 6.9 2.2 0.3

Lpp 2.0 0.8 0.4 4930427A07Rik 4.8 1.7 0.4 Usp43 2.6 0.8 0.3

Fam92a 14.9 6.2 0.4 Fkbp9 11.2 4.0 0.4 Sybu 4.0 1.3 0.3

Flywch2 53.0 21.8 0.4 Aplp1 59.0 21.2 0.4 Cdk5r1 3.7 1.1 0.3

Ssr1 2.4 1.0 0.4 Slc35c1 9.7 3.5 0.4 Uros 4.6 1.4 0.3

Mertk 7.8 3.2 0.4 Wisp1 17.8 6.4 0.4 Plcd3 5.3 1.6 0.3

Ebag9 12.3 5.1 0.4 Myo5a 2.1 0.8 0.4 Bnc1 8.3 2.6 0.3

Stau1 12.5 5.1 0.4 Zfp553 3.8 1.4 0.4 Bai1 2.9 0.9 0.3

Pfn2 15.0 6.2 0.4 E130203B14Rik 4.9 1.7 0.4 Cd2ap 5.5 1.7 0.3

Vangl2 12.0 4.9 0.4 Metrnl 7.8 2.8 0.4 Adam1a 2.1 0.7 0.3

Cdh11 3.0 1.2 0.4 Mpzl1 23.6 8.4 0.4 Fat4 1.7 0.5 0.3

Sash1 5.9 2.4 0.4 Fnbp1l 9.8 3.4 0.4 Prps2 8.9 2.7 0.3

Pik3ip1 10.3 4.2 0.4 Tctn3 8.0 2.8 0.4 Galns 5.5 1.7 0.3

Jag1 8.7 3.5 0.4 Camk2n1 20.1 7.1 0.4 Enah 21.2 6.5 0.3

Tbc1d16 1.7 0.7 0.4 Id1 29.6 10.4 0.4 Mylk3 4.7 1.4 0.3

Lrch1 3.3 1.4 0.4 Satb2 11.2 3.9 0.4 Pnldc1 13.1 4.0 0.3

Sec24d 5.9 2.4 0.4 Tmem39a 11.4 4.0 0.4 Sox21 29.3 8.9 0.3

Tgfbr2 10.4 4.2 0.4 Celsr1 9.9 3.5 0.3 Mdm2 3.3 1.0 0.3

Itpripl2 9.9 4.0 0.4 BC037034 13.7 4.8 0.3 Dtnb 10.1 3.1 0.3

Dip2a 4.2 1.7 0.4 Msi2 10.3 3.6 0.3 Pgm5 2.6 0.8 0.3

Peg3 2.0 0.8 0.4 Stard8 2.8 1.0 0.3 Tchh 6.7 2.0 0.3

Numb 18.9 7.6 0.4 Ttyh3 7.8 2.7 0.3 Gpc3 5.7 1.7 0.3

Phldb2 2.7 1.1 0.4 Mpv17l 4.1 1.4 0.3 Prc1 1.6 0.5 0.3

Trnau1ap 17.8 7.1 0.4 Pkdcc 11.9 4.1 0.3 Myo16 2.0 0.6 0.3

Fam198b 1.5 0.6 0.4 Zfp503 4.9 1.7 0.3 Arsb 14.5 4.3 0.3

Far1 3.7 1.5 0.4 Id2 29.5 10.2 0.3 Gfpt1 4.8 1.4 0.3

Zbtb11 5.0 2.0 0.4 LOC100042049 16.5 5.7 0.3 Nsg1 8.7 2.6 0.3

Palld 3.2 1.2 0.4 Cttnbp2 1.7 0.6 0.3 Cyp1b1 3.0 0.9 0.3

Hs3st3b1 4.6 1.8 0.4 Rin2 3.6 1.2 0.3 Sirpa 22.2 6.6 0.3

Spsb1 8.8 3.4 0.4 Olfml3 33.2 11.4 0.3 Dux 5.8 1.7 0.3

Selm 38.0 14.8 0.4 Copz2 42.4 14.5 0.3 Zfp326 7.2 2.1 0.3

BC017158 3.8 1.5 0.4 Lhfpl2 11.5 3.9 0.3 Tmem108 5.3 1.5 0.3

Golga5 5.2 2.0 0.4 Gm16039 4.8 1.6 0.3 Sox12 5.4 1.6 0.3

Vash1 3.1 1.2 0.4 Ern1 4.9 1.7 0.3 Raph1 12.8 3.7 0.3

Daglb 4.1 1.6 0.4 Lrrc8c 8.6 2.9 0.3 Btbd10 3.6 1.1 0.3

Efnb2 3.6 1.4 0.4 Fam108b 9.9 3.3 0.3 Ptpn18 4.3 1.2 0.3

Adamts9 2.2 0.9 0.4 Pik3c2a 5.2 1.8 0.3 Tgfbr3 1.9 0.5 0.3

**Gene Sec Mat Fold Gene Sec Mat Fold Gene Sec Mat Fold**

A430105I19Rik 2.0 0.6 0.3 Mageh1 11.7 2.6 0.2 Hunk 3.5 0.4 0.1

Fam114a1 6.6 1.9 0.3 Mapk9 5.6 1.2 0.2 Hpgd 3.1 0.4 0.1

Iffo1 4.5 1.3 0.3 Kcnk12 6.1 1.3 0.2 Chst1 43.9 5.4 0.1

Samd5 3.3 0.9 0.3 2010002N04Rik 14.8 3.2 0.2 Tac2 6.2 0.7 0.1

Slc7a2 2.6 0.7 0.3 Cachd1 6.4 1.4 0.2 Aifm3 5.0 0.6 0.1

Lyst 2.5 0.7 0.3 Cst6 2.9 0.6 0.2 Fras1 6.4 0.7 0.1

Lrrc8d 6.8 1.9 0.3 Nuak1 2.7 0.6 0.2 Zfp423 4.1 0.5 0.1

Golgb1 12.9 3.6 0.3 Nuak1 107.1 22.8 0.2 6030419C18Rik 8.6 1.0 0.1

Mmp20 36.3 10.2 0.3 Pla2g5 12.1 2.5 0.2 Usp54 7.4 0.8 0.1

Lcat 4.2 1.2 0.3 Clip2 10.2 2.1 0.2 Anks6 5.2 0.6 0.1

Rara 3.1 0.9 0.3 St3gal4 17.7 3.7 0.2 Kcna3 7.4 0.8 0.1

Mdm1 1.7 0.5 0.3 Ildr2 6.7 1.4 0.2 Nmnat2 6.3 0.7 0.1

Fam43a 4.4 1.2 0.3 Kcnk5 2.3 0.5 0.2 Slc24a3 13.9 1.4 0.1

Cadm1 3.4 0.9 0.3 Sfxn2 2.6 0.5 0.2 Srgap1 8.3 0.8 0.1

Cep72 1.9 0.5 0.3 Dhx32 12.5 2.5 0.2 Rab38 11.8 1.2 0.1

Mafb 9.7 2.6 0.3 Snai2 6.0 1.2 0.2 Daf2 3.5 0.3 0.1

Tbc1d12 9.8 2.6 0.3 Kcnj2 4.2 0.8 0.2 Rap1gap 11.4 1.1 0.1

Ggt5 2.0 0.5 0.3 Gdf5 5.0 1.0 0.2 Rnase4 17.2 1.6 0.1

Gpm6a 3.7 1.0 0.3 Map2k6 6.6 1.3 0.2 Greb1 3.9 0.4 0.1

Cyth3 10.4 2.8 0.3 Thsd4 1.8 0.4 0.2 Aldh18a1 10.8 1.0 0.1

Fam3c 16.2 4.3 0.3 Bnc2 3.7 0.7 0.2 Cacna1d 3.1 0.3 0.1

Rcan2 21.9 5.9 0.3 Fstl1 12.2 2.4 0.2 Unc5a 2.8 0.3 0.1

Steap2 1.8 0.5 0.3 Pgcp 4.7 0.9 0.2 Gclm 11.6 1.1 0.1

Anp32e 22.1 5.8 0.3 Plxna4 1.7 0.3 0.2 Lgals12 2.4 0.2 0.1

Enc1 7.4 1.9 0.3 Nme4 8.6 1.7 0.2 Tmem229b 8.7 0.8 0.1

Apc 10.8 2.8 0.3 Dlx4 3.6 0.7 0.2 Shh 3.1 0.3 0.1

Dnajc25 3.7 0.9 0.3 Dbc1 3.5 0.7 0.2 D630045J12Rik 13.4 1.2 0.1

Glrx 9.3 2.4 0.3 N4bp3 23.6 4.5 0.2 Wnt3a 2.5 0.2 0.1

Camk1g 3.4 0.9 0.3 Cd248 26.2 5.0 0.2 Arhgap28 7.5 0.6 0.1

Runx1 11.8 3.0 0.3 Nanos3 7.4 1.4 0.2 Itpr1 12.3 1.0 0.1

Pip5k1b 10.7 2.7 0.3 Clstn1 35.9 6.8 0.2 Otos 10.9 0.9 0.1

Ccdc45 2.3 0.6 0.3 Xkr6 1.9 0.3 0.2 Scube3 3.5 0.3 0.1

Stx18 23.5 5.9 0.3 Mgat5 3.9 0.7 0.2 Entpd3 14.7 1.2 0.1

Gale 10.7 2.7 0.3 Gm5065 3.7 0.7 0.2 Hells 2.2 0.2 0.1

Fam109b 6.3 1.6 0.3 Mpz 3.2 0.6 0.2 Papln 60.0 4.6 0.1

Snx25 4.0 1.0 0.2 G0s2 39.6 7.1 0.2 Sec16b 4.9 0.4 0.1

Wnt6 14.9 3.7 0.2 Ralgps2 2.0 0.4 0.2 Lrrc34 5.4 0.4 0.1

Bmp4 7.8 1.9 0.2 Susd5 14.9 2.7 0.2 Galnt12 44.3 3.1 0.1

Adcy6 2.7 0.7 0.2 Rhov 2.9 0.5 0.2 Pstpip1 14.5 1.0 0.1

Rcn3 18.6 4.6 0.2 Slc37a3 6.1 1.1 0.2 Fut1 3.0 0.2 0.1

Gcom1 2.6 0.6 0.2 Plekhh1 9.4 1.6 0.2 Uty 2.2 0.1 0.1

Xylt1 3.1 0.7 0.2 Specc1 6.5 1.1 0.2 Steap1 12.7 0.8 0.1

Coro2b 2.7 0.7 0.2 Fstl4 3.1 0.5 0.2 Ddx3y 4.6 0.3 0.1

Satb1 26.8 6.5 0.2 Tppp 3.9 0.7 0.2 Krt15 5.3 0.3 0.1

2810008M24Rik 13.1 3.1 0.2 Jph4 3.9 0.6 0.2 Ptch2 1.7 0.1 0.1

Elmo1 26.0 6.2 0.2 Olfr920 1.9 0.3 0.2 Gm10494 2.2 0.1 0.1

Calcoco1 15.7 3.8 0.2 Lmnb1 5.0 0.8 0.2 Fndc1 5.9 0.3 0.1

Gxylt2 3.7 0.9 0.2 Maf 24.0 3.8 0.2 Relt 19.3 1.1 0.1

Gatsl3 12.0 2.9 0.2 AI504432 8.8 1.4 0.2 Fhod3 2.7 0.1 0.1

Cygb 5.4 1.3 0.2 Tesc 38.1 6.0 0.2 Gal3st4 7.2 0.3 0.0

Creb3l2 8.7 2.1 0.2 Fkbp1b 18.1 2.8 0.2 Eif2s3y 18.1 0.8 0.0

Thbs1 2.0 0.5 0.2 Tle4 4.4 0.7 0.2 Fam163a 2.7 0.1 0.0

Cdr2 2.9 0.7 0.2 Penk 4.9 0.7 0.1 Rpl35 223.1 4.2 0.0

Tox 1.9 0.5 0.2 Dlx6 6.1 0.9 0.1 1700001K23Rik 9.5 0.0 0.0

Mapkbp1 2.2 0.5 0.2 Klk8 4.4 0.6 0.1 Ddx25 1.7 0.0 0.0

Slc16a6 3.2 0.7 0.2 Trp53i11 6.1 0.9 0.1 Fabp7 5.6 0.0 0.0

2010109K11Rik 2.1 0.5 0.2 Papss2 10.1 1.4 0.1 LOC100040031 2.4 0.0 0.0

Pdcd4 4.3 1.0 0.2 Ctnna2 22.7 3.0 0.1 LOC100040911 1.9 0.0 0.0

Zbed3 14.4 3.3 0.2 Rassf10 10.5 1.4 0.1 MGC107098 1.8 0.0 0.0

Pik3c2b 7.0 1.6 0.2 F2r 29.7 3.8 0.1 Ssty1 1.5 0.0 0.0

Wnt7a 3.3 0.7 0.2 Cldn10 9.8 1.3 0.1 Ssty2 1.7 0.0 0.0

Fam46a 16.5 3.7 0.2 Cobl 13.2 1.7 0.1

Inpp5j 1.9 0.4 0.2 Acpp 8.4 1.1 0.1

9130024F11Rik 9.8 2.2 0.2 Gli1 6.0 0.8 0.1
